# Supplementary material for: Operational Variables on the Processing of Porous Titanium Bodies by Gelation of Slurries with an Expansive Porogen
Source: MDPI journal article supplement (doi:10.3390/ma14164744), 2021-08-22
Supplement: s1 [file s1]

# Supplementary Materials

**Table S1.** Normalized values of the operational processing variables.

| Num. | Experiment | X <sub>G</sub><br>(g/L) | X <sub>P</sub><br>(%) | X <sub>T</sub><br>(°C) |
|------|------------|-------------------------|-----------------------|------------------------|
| 1    | 0 0 0      | 10                      | 20                    | 70                     |
| 2    | 1 1 1      | 12                      | 25                    | 80                     |
| 3    | -1 1 1     | 8                       | 25                    | 80                     |
| 4    | 1 1 -1     | 12                      | 25                    | 60                     |
| 5    | -1 1 -1    | 8                       | 25                    | 60                     |
| 6    | 1 -1 1     | 12                      | 15                    | 80                     |
| 7    | -1 -1 1    | 8                       | 15                    | 80                     |
| 8    | 1 -1 -1    | 12                      | 15                    | 60                     |
| 9    | -1 -1 -1   | 8                       | 15                    | 60                     |
| 10   | 0 1 0      | 10                      | 25                    | 70                     |
| 11   | 0 -1 0     | 10                      | 15                    | 70                     |
| 12   | 0 0 1      | 10                      | 20                    | 80                     |
| 13   | 0 0 -1     | 10                      | 20                    | 60                     |
| 14   | 1 0 0      | 12                      | 20                    | 70                     |
| 15   | -1 0 0     | 8                       | 20                    | 70                     |

**Table S2.** Summary of experimental values corresponding to the viscosities, apparent densities and mean pore diameters of samples obtained from experimental design defined in table S1.

| Num. | X <sub>G</sub><br>(g/L) | X <sub>P</sub><br>(%) | X <sub>T</sub><br>(°C) | η <sub>0</sub><br>(mPa·s) | η <sub>∞</sub><br>(mPa·s) | η <sub>100s<sup>-1</sup></sub><br>(mPa·s) | D<br>(g/cm <sup>3</sup> ) | P<br>(μm) |
|------|-------------------------|-----------------------|------------------------|---------------------------|---------------------------|-------------------------------------------|---------------------------|-----------|
| 1    | 0                       | 0                     | 0                      | 1720                      | 355                       | 179                                       | 2.38                      | 7.07      |
| 2    | 1                       | 1                     | 1                      | 350                       | 191                       | 205                                       | 1.77                      | 6.27      |
| 3    | -1                      | 1                     | 1                      | 1340                      | 194                       | 233                                       | 2.15                      | 7.17      |
| 4    | 1                       | 1                     | -1                     | 350                       | 191                       | 205                                       | 1.85                      | 9.28      |
| 5    | -1                      | 1                     | -1                     | 1340                      | 194                       | 233                                       | 1.98                      | 7.11      |
| 6    | 1                       | -1                    | 1                      | 280                       | 67                        | 153                                       | 2.37                      | 6.22      |
| 7    | -1                      | -1                    | 1                      | 250                       | 165                       | 143                                       | 2.44                      | 6.62      |
| 8    | 1                       | -1                    | -1                     | 280                       | 67                        | 153                                       | 1.95                      | 7.33      |
| 9    | -1                      | -1                    | -1                     | 250                       | 165                       | 143                                       | 2.24                      | 6.41      |
| 10   | 0                       | 1                     | 0                      | -                         | 539                       | 646                                       | 2.46                      | 9.93      |
| 11   | 0                       | -1                    | 0                      | 1320                      | 344                       | 166                                       | 2.50                      | 6.98      |
| 12   | 0                       | 0                     | 1                      | 1720                      | 355                       | 179                                       | 2.56                      | 6.09      |
| 13   | 0                       | 0                     | -1                     | 1720                      | 355                       | 179                                       | 2.22                      | 6.49      |
| 14   | 1                       | 0                     | 0                      | 340                       | 127                       | 187                                       | 1.99                      | 7.24      |
| 15   | -1                      | 0                     | 0                      | 740                       | 183                       | 190                                       | 2.01                      | 6.13      |

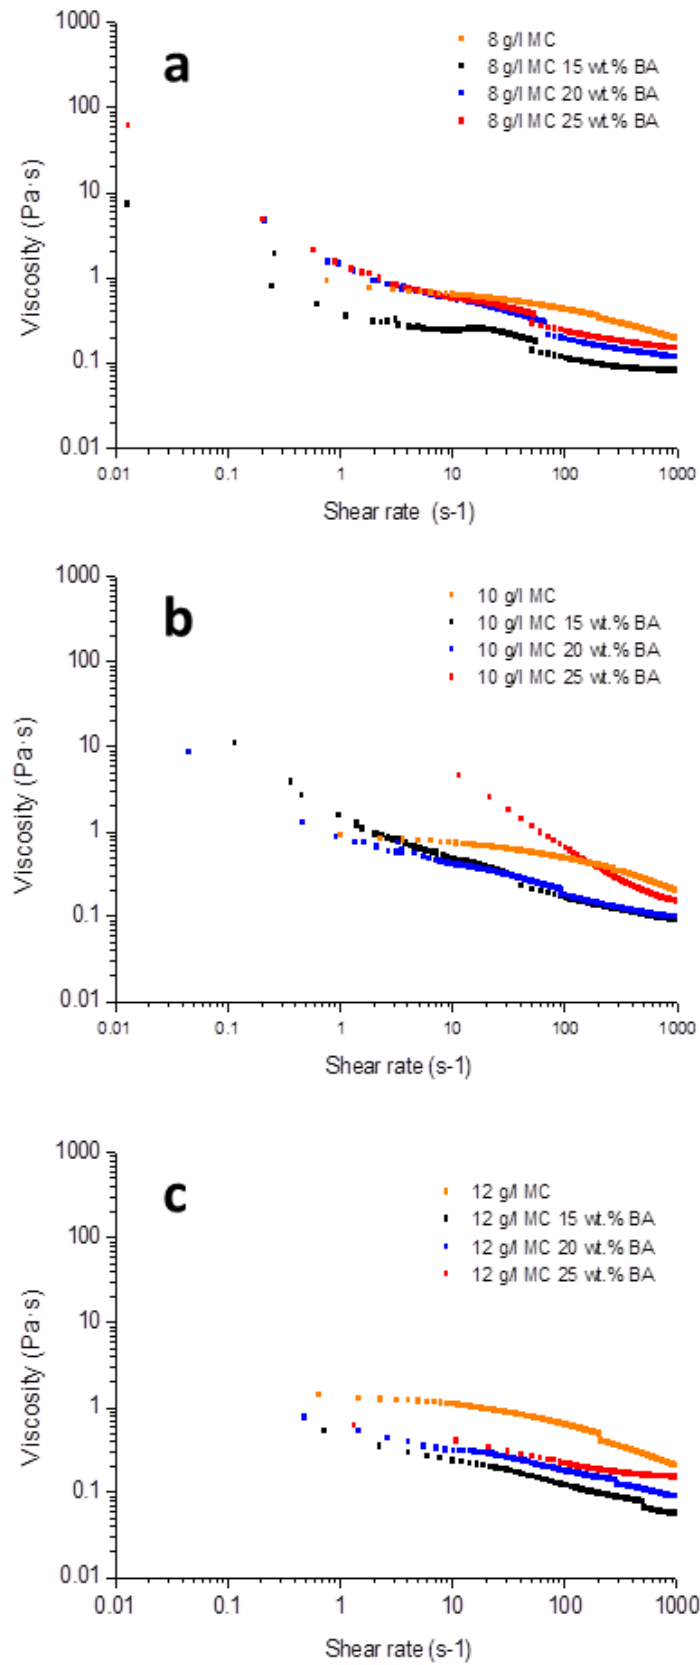

**Figure S1.** Evolution of the viscosity with the shear rate of suspensions with 15,20 and 25%wt. BA and a) 8g/L of MC, b)10g/L of MC and c) 12g/L of MC.

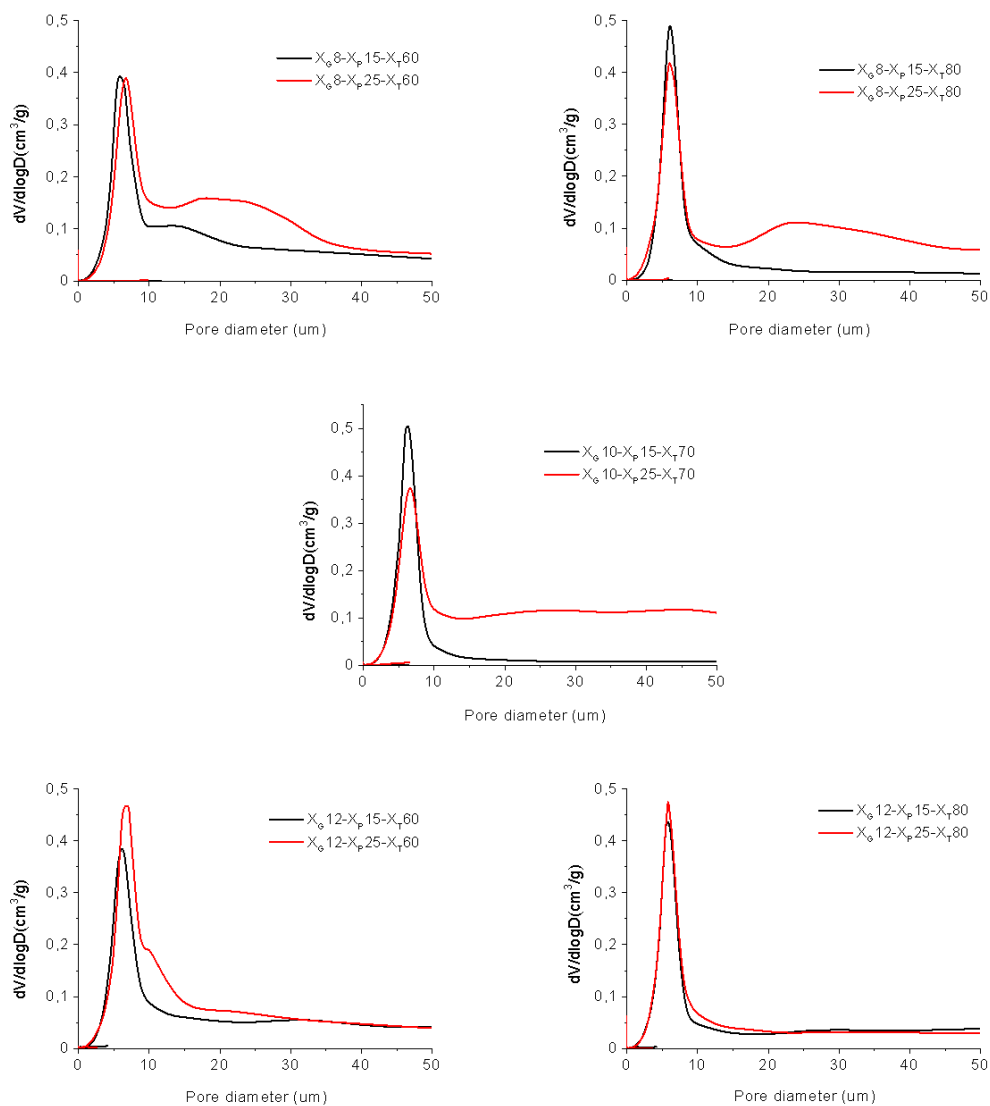

**Figure S2.** Mercury Intrusion Porosimetry Curves of the samples with different XP at the same XT or XG.
